# Supplementary material for: Investigating the role of IDO1 in tumors: correlating IDO1 expression with clinical pathological features and prognosis in lung adenocarcinoma patients
Source: PeerJ. 2025 Feb 19;13:e18776. doi: 10.7717/peerj.18776 (PMC11846502; doi:10.7717/peerj.18776)
Supplement: Supplemental Information 1 [file peerj-13-18776-s001.xlsx]

## Sheet: Raw Data
patients	Sex (1: Male，0: Female)	Age（1: ≥65，0: <65）	Lymph node metastasis (1: Yes, 0: No)	Pleural Invasion (1: Yes, 0: No)	Tumor Localization (1: Lift, 0: Right)	Allergic history (1: Yes, 0: No)	Hypertension (1: Yes, 0: No)	Cardiovascular disease (1: Yes, 0: No)	Tumor history (1: Yes, 0: No)	Surgical History (1: Yes, 0: No)	Diabetes (1: Yes, 0: No)	BMI (1: ≥25, 0: <25)	Smoking history (1: Yes, 0: No)	Family history (1: Yes, 0: No)	Drinking history (1: Yes, 0: No)	Recurrence and distant Metastasis (1: Yes, 0: No)	Preoperative Chemotherapy (1: Yes, 0: No)	PFS (1: ≥36, 0: <36)	PFS (Months)	OS (1: ≥60, 0: <60)	OS (Months)	Tumor Differentiation Grade (1: Low, 0: Middle or High)	Tumor Maximum diameter (1: ≥3mM, 0:<3mM)	IDO1 (1: Pos, 0: Neg)	IDO1 scores	Clinical TNM Staging (1: I, 2: II, 3: III, 4: IV)	Tumour with Solid components (1: Yes, 0: No)
1	0	1	1	1	1	0	1	0	0	0	0	0	0	0	0	1	0	1	80	1	89	1	0	1	12	3	0
2	0	1	1	1	0	0	1	0	0	0	1	1	0	0	0	1	0	1	77	1	77	1	0	1	12	3	1
3	1	0	1	1	1	0	1	0	0	0	1	0	1	1	1	0	0	1	63	1	63	1	1	1	12	2	1
4	1	0	0	0	0	0	0	0	0	0	0	0	1	0	1	0	0	1	61	1	75	1	0	1	12	1	1
5	0	0	1	1	0	0	0	0	0	0	0	1	0	0	0	1	1	1	51	1	83	1	0	1	9	4	0
6	0	0	1	0	1	0	0	0	0	0	0	0	0	0	0	1	0	0	23	1	79	0	1	1	9	3	0
7	0	1	1	1	0	0	0	0	0	0	0	0	0	0	0	0	0	0	2	0	2	0	0	1	9	3	0
8	0	0	0	0	1	0	0	0	0	0	1	0	0	0	0	1	0	0	0	0	0	0	0	1	9	1	0
9	1	1	1	1	1	1	0	0	0	0	0	1	1	1	0	1	0	1	68	1	68	1	1	1	8	3	0
10	1	0	1	1	0	0	0	0	0	0	0	1	1	1	1	1	1	0	32	1	64	1	0	1	8	3	0
11	1	0	1	1	0	1	0	1	0	0	0	0	1	0	1	1	0	0	25	1	60	1	1	1	8	3	0
12	1	0	1	0	0	0	0	0	0	0	0	0	1	0	1	1	0	0	25	0	49	0	1	1	8	3	1
13	1	1	1	0	1	0	1	1	0	0	0	0	0	0	0	0	0	0	22	0	35	0	1	1	8	3	1
14	0	1	1	1	0	0	1	0	0	0	0	0	0	0	0	1	1	0	15	0	17	0	1	1	8	3	0
15	0	0	1	1	0	0	1	0	0	0	0	0	0	0	0	0	0	0	13	1	61	0	0	1	8	3	1
16	1	1	0	1	0	0	1	0	1	1	0	0	1	1	0	1	0	0	12	0	12	1	1	1	8	2	1
17	1	1	1	1	1	0	1	0	0	0	0	0	1	0	0	0	0	0	12	0	12	1	0	1	8	2	1
18	1	0	0	0	0	0	0	0	0	0	0	0	1	0	1	0	1	0	7	0	11	1	1	1	8	2	1
19	0	1	0	1	0	0	0	0	0	0	0	0	1	1	1	1	0	0	4	0	4	1	1	1	8	2	1
20	0	0	0	1	0	1	1	0	0	0	0	0	0	0	0	0	0	0	2	0	2	1	1	1	8	2	0
21	1	1	1	1	0	0	1	0	0	0	0	0	1	0	0	0	0	0	1	0	1	1	0	1	8	1	1
22	0	0	1	1	0	0	0	0	0	0	0	1	0	0	0	1	0	1	85	1	85	0	0	1	6	4	0
23	1	0	1	0	0	0	1	0	0	0	0	1	1	0	0	0	0	1	81	1	81	1	0	1	6	3	0
24	0	0	1	1	1	0	1	0	0	0	1	1	0	0	0	0	0	1	77	1	77	1	0	1	6	3	0
25	1	0	1	0	0	1	0	0	0	0	0	1	1	0	0	1	1	1	75	1	75	0	0	1	6	3	0
26	1	0	1	0	0	0	0	0	0	0	0	1	1	0	1	0	0	1	62	1	62	0	0	1	6	3	1
27	1	1	1	1	1	1	0	0	0	0	0	1	0	0	0	0	0	1	62	1	62	0	1	1	6	3	1
28	1	0	1	1	0	0	0	0	0	0	0	1	0	0	0	1	0	1	47	0	47	1	0	1	6	2	0
29	1	1	1	1	1	0	1	1	0	0	0	0	1	0	0	0	0	1	45	1	73	0	0	1	6	2	0
30	0	1	1	0	1	0	1	1	0	0	0	0	0	0	0	0	0	1	37	0	37	0	0	1	6	2	0
31	0	1	1	1	0	0	1	1	0	0	0	0	0	0	0	1	0	0	33	0	33	0	0	1	6	2	1
32	0	0	0	1	1	0	0	0	0	1	0	0	0	0	0	0	0	0	31	0	31	0	0	1	6	1	0
33	1	1	0	1	1	0	1	0	0	0	0	0	0	0	0	0	0	0	14	0	15	0	1	1	6	1	0
34	0	1	0	1	1	1	0	0	0	0	0	0	0	0	0	1	0	0	4	0	4	0	1	1	6	1	0
35	1	1	0	0	1	0	0	1	1	1	0	0	1	0	1	0	1	0	4	0	4	0	0	1	6	1	0
36	0	0	0	0	0	1	0	0	0	0	0	0	0	0	0	0	0	0	1	0	1	0	0	1	6	1	0
37	1	0	0	0	0	0	0	0	0	0	0	0	1	0	1	0	0	0	1	0	1	0	0	1	6	1	0
38	0	1	0	0	1	0	1	1	0	0	0	0	0	0	0	0	0	0	1	0	1	0	0	1	6	1	0
39	0	1	0	0	0	1	0	0	0	1	0	0	0	0	0	0	0	0	0	0	25	0	0	1	6	1	0
40	0	0	0	0	0	0	0	0	0	0	0	0	0	0	0	0	0	0	0	0	4	0	0	1	6	1	0
41	0	0	0	0	0	0	0	0	0	0	0	0	0	0	0	0	0	0	0	0	0	0	0	1	6	1	0
42	0	0	1	1	0	1	0	0	0	0	0	1	0	0	0	0	0	1	89	1	89	1	0	0	4	3	0
43	0	0	1	1	0	0	0	0	0	0	0	1	0	0	0	0	0	1	83	1	83	1	0	0	4	3	1
44	1	0	1	0	0	1	0	0	0	0	0	0	1	0	0	0	0	1	81	1	81	0	1	0	4	3	0
45	0	1	1	0	1	0	0	1	1	1	1	0	0	0	0	1	0	1	77	1	77	1	0	0	4	2	1
46	1	1	1	1	0	0	0	0	0	0	0	0	1	0	1	1	0	1	67	1	67	0	1	0	4	2	0
47	1	1	0	0	1	0	0	0	1	1	0	0	0	0	0	0	0	0	16	0	16	0	0	0	4	1	0
48	0	0	0	0	1	0	0	0	0	1	0	0	0	1	1	0	0	0	11	1	71	0	0	0	4	1	0
49	1	0	0	0	0	0	0	1	0	0	0	0	1	0	1	0	0	0	11	0	34	0	0	0	4	1	0
50	0	0	0	0	0	0	0	0	0	0	0	0	0	0	0	0	0	0	1	0	1	0	0	0	4	1	0
51	1	0	1	1	1	0	1	0	0	0	1	1	1	0	1	1	1	/	/	/	/	1	0	0	3	3	0
52	0	0	0	1	1	1	0	0	0	1	0	1	0	0	0	0	1	1	85	1	85	0	1	0	3	3	1
53	1	0	1	0	1	0	1	0	0	0	0	1	1	0	1	0	0	1	85	1	85	0	1	0	3	3	0
54	0	0	1	1	1	0	0	0	0	0	0	1	0	0	0	0	0	1	84	1	84	0	0	0	3	3	0
55	0	1	0	0	0	0	1	0	0	0	0	1	0	0	0	0	1	1	83	1	83	0	1	0	3	2	0
56	0	1	0	0	0	1	0	0	0	0	1	0	0	1	1	1	0	1	82	1	82	0	1	0	3	2	0
57	0	0	0	1	0	0	0	1	0	0	0	0	0	0	0	0	0	1	82	1	82	0	1	0	3	1	0
58	1	0	0	0	0	0	0	0	0	1	0	0	0	0	0	0	0	1	80	1	80	0	1	0	3	1	0
59	1	1	0	1	0	0	1	0	0	1	0	0	1	0	0	1	0	1	79	1	79	0	1	0	3	1	0
60	1	0	0	0	0	0	0	0	0	1	0	0	0	0	0	0	0	1	78	1	78	0	1	0	3	1	0
61	0	1	0	0	1	0	0	0	0	0	0	0	0	0	0	0	0	1	73	1	73	0	1	0	3	1	0
62	0	1	0	0	0	0	0	1	1	1	0	0	0	0	0	0	0	1	65	1	85	0	0	0	3	1	0
63	0	0	0	0	0	0	0	0	1	0	0	0	0	0	0	0	0	1	65	1	65	0	0	0	3	1	0
64	0	0	0	0	1	1	1	1	1	1	0	0	0	0	0	0	0	1	65	1	65	0	0	0	3	1	0
65	0	0	0	0	0	0	0	0	0	0	0	0	0	0	1	0	0	1	62	1	62	0	0	0	3	1	0
66	1	0	0	0	1	0	0	0	0	0	0	0	0	0	1	0	0	1	49	1	82	0	0	0	3	1	0
67	1	0	0	0	1	0	0	0	0	0	0	0	0	0	0	0	0	0	18	0	18	0	0	0	3	1	0
68	0	0	0	0	0	0	0	0	0	0	0	0	0	1	1	0	0	0	16	0	18	0	0	0	3	1	0
69	0	0	0	0	1	0	1	1	1	1	0	0	0	0	0	0	1	0	2	0	2	0	0	0	3	1	0
70	1	0	1	0	1	0	0	0	0	0	1	1	1	0	0	0	0	/	/	/	/	1	0	0	2	3	1
71	0	0	1	1	0	1	0	0	0	0	0	1	0	0	0	0	0	1	82	1	82	1	0	0	2	3	1
72	1	0	1	1	1	0	0	1	0	0	0	0	1	0	1	0	0	1	82	1	82	1	1	0	2	3	1
73	1	0	1	0	0	0	0	1	0	0	0	0	1	1	1	0	0	1	80	1	80	1	0	0	2	3	1
74	1	0	1	1	0	0	1	0	0	0	0	0	0	0	0	0	0	1	78	1	78	1	0	0	2	2	1
75	1	0	0	0	1	0	0	1	0	1	0	0	1	0	1	0	0	1	74	1	74	1	1	0	2	2	0
76	1	1	1	1	1	0	1	0	0	0	0	0	1	0	1	0	0	1	60	1	60	0	0	0	2	2	0
77	1	0	1	1	0	1	0	0	0	0	0	0	0	0	0	1	0	0	34	0	34	0	0	0	2	2	0
78	0	0	1	0	0	0	0	0	0	0	0	0	0	0	0	0	0	0	27	1	61	0	0	0	2	2	0
79	1	0	0	0	1	0	0	0	0	0	0	0	1	0	1	0	0	0	23	0	23	0	1	0	2	2	1
80	0	1	0	0	0	1	1	0	0	1	0	0	0	0	0	0	0	0	15	0	15	0	1	0	2	2	0
81	1	1	0	1	0	0	0	1	0	0	0	0	1	0	0	0	0	0	13	0	13	0	1	0	2	2	0
82	1	0	0	0	0	1	0	1	0	0	0	0	1	0	1	0	0	0	11	0	11	0	0	0	2	1	0
83	0	1	0	0	0	1	1	0	1	1	0	0	0	0	0	0	0	0	9	0	9	0	0	0	2	1	0
84	0	0	0	0	1	1	0	0	0	0	0	0	0	0	0	0	0	0	3	0	3	0	0	0	2	1	0
85	1	0	0	0	1	0	0	0	0	0	0	0	1	0	1	0	0	0	1	0	1	0	0	0	2	1	0
86	0	1	1	0	1	0	1	0	0	0	0	1	0	1	0	1	0	1	73	1	75	1	1	0	1	3	0
87	0	0	1	1	0	0	0	0	0	0	0	1	0	0	0	1	0	1	73	1	73	1	0	0	1	3	1
88	1	0	1	1	1	0	0	0	0	0	0	0	0	0	0	1	0	1	64	1	64	1	1	0	1	3	1
89	1	0	1	1	0	0	0	0	0	1	0	0	1	1	1	0	0	1	52	0	52	1	1	0	1	2	1
90	0	1	0	1	0	0	0	0	1	1	0	0	0	0	0	0	0	1	44	0	44	0	1	0	1	2	0
91	0	1	0	1	0	0	1	1	0	0	0	0	0	0	0	0	0	0	16	0	35	0	1	0	1	2	0
92	0	1	0	0	1	1	0	1	0	0	0	0	0	0	0	0	0	0	13	0	13	0	0	0	1	1	0
93	0	1	0	0	0	0	1	1	0	0	0	0	0	0	0	0	0	0	9	0	9	0	0	0	1	1	0
94	1	0	1	0	1	0	0	0	0	0	0	1	1	0	1	1	0	1	91	1	91	1	1	0	0	3	0
95	0	1	1	1	0	0	1	0	0	0	0	1	0	0	0	0	0	1	88	1	88	0	1	0	0	3	0
96	0	0	1	0	1	1	1	0	0	0	0	1	0	1	0	1	0	1	85	1	85	0	0	0	0	3	0
97	1	0	1	1	0	0	0	0	0	1	0	1	1	0	0	0	0	1	85	1	85	0	0	0	0	3	0
98	1	1	1	0	1	1	1	1	0	0	0	1	0	0	0	0	0	1	85	1	85	0	0	0	0	3	0
99	1	1	1	1	0	0	1	0	0	0	0	1	1	0	0	0	0	1	84	1	84	0	0	0	0	3	0
100	0	1	1	1	1	0	0	1	0	0	0	1	0	0	1	0	0	1	84	1	84	0	0	0	0	3	0
101	1	0	1	1	0	0	0	1	0	0	0	1	1	1	1	1	0	1	82	1	82	0	1	0	0	3	0
102	1	0	0	0	0	0	0	1	0	0	0	1	1	0	0	0	0	1	81	1	81	0	1	0	0	3	0
103	0	1	1	1	0	0	0	0	0	0	0	1	0	0	0	1	1	1	80	1	80	0	0	0	0	3	0
104	0	1	1	1	1	0	1	1	0	0	0	1	0	0	0	1	0	1	80	1	80	1		0	0	2	0
105	0	1	0	1	1	0	1	0	0	1	1	1	0	0	0	1	0	1	79	1	79	1	1	0	0	2	0
106	0	1	0	0	1	0	0	1	0	1	0	1	0	0	0	1	0	1	79	1	79	1	1	0	0	2	0
107	0	0	1	0	1	0	0	0	1	1	0	1	0	1	0	0	0	1	79	1	79	0	0	0	0	2	0
108	0	0	1	0	1	0	0	0	0	0	0	1	0	0	0	0	0	1	78	1	78	0	0	0	0	2	1
109	0	0	0	1	1	1	0	1	0	0	0	1	0	0	0	0	0	1	77	1	77	0	1	0	0	2	0
110	0	0	1	0	1	1	0	0	0	0	0	0	0	0	0	1	0	1	77	1	77	0	0	0	0	2	1
111	0	0	0	1	1	0	1	0	0	0	0	0	0	0	0	0	0	1	77	1	77	0	1	0	0	2	0
112	1	1	1	1	0	0	1	1	0	1	0	0	1	0	1	1	0	1	73	1	73	0	1	0	0	2	0
113	1	1	0	1	1	1	1	0	0	1	0	0	1	0	1	0	0	1	73	1	73	1	1	0	0	1	0
114	1	0	0	1	1	0	0	0	0	0	0	0	1	0	1	0	0	1	71	1	71	0	1	0	0	1	1
115	0	1	0	1	1	0	0	0	0	0	0	0	0	0	0	0	0	1	69	1	84	0	1	0	0	1	0
116	0	1	0	1	0	0	1	1	0	0	0	0	0	0	0	0	0	1	68	1	68	0	1	0	0	1	0
117	1	1	0	0	1	0	1	1	0	0	0	0	1	0	0	0	0	1	66	1	71	0	1	0	0	1	0
118	0	1	1	1	1	0	1	0	0	0	0	0	0	0	0	0	0	1	62	1	62	0	1	0	0	1	0
119	0	1	0	1	1	1	0	0	0	1	0	0	0	0	0	0	0	1	61	1	61	0	1	0	0	1	0
120	0	0	0	1	0	0	0	0	0	0	0	0	0	0	0	0	0	1	61	1	61	0	1	0	0	1	0
121	0	0	0	0	1	0	0	0	1	1	0	0	0	0	0	0	0	1	57	0	57	0	0	0	0	1	0
122	1	0	0	0	1	0	0	0	0	0	0	0	0	0	0	1	0	1	51	0	51	0	0	0	0	1	0
123	0	0	0	0	1	1	0	1	0	0	1	0	0	0	0	0	0	1	49	0	49	0	0	0	0	1	0
124	0	0	0	0	0	1	1	0	0	0	0	0	0	0	0	0	0	1	42	0	50	0	0	0	0	1	0
125	0	0	0	0	0	1	0	0	0	0	0	0	0	0	0	0	0	1	38	0	38	0	0	0	0	1	0
126	1	0	0	0	1	1	0	0	0	0	0	0	0	0	1	0	0	1	38	0	38	0	0	0	0	1	0
127	1	0	0	0	1	1	1	0	0	0	0	0	1	0	1	0	0	0	35	1	61	0	0	0	0	1	0
128	0	0	0	0	0	0	0	0	0	0	1	0	0	1	0	0	0	0	34	1	73	0	0	0	0	1	0
129	0	0	0	0	0	0	0	0	1	1	0	0	0	0	0	0	0	0	34	0	34	0	0	0	0	1	0
130	1	0	0	0	0	0	0	1	0	0	0	0	0	0	1	1	0	0	29	0	45	0	0	0	0	1	0
131	0	1	0	0	0	0	1	0	1	1	0	0	0	0	0	0	0	0	28	0	28	0	0	0	0	1	0
132	1	0	0	0	1	0	1	0	0	0	0	0	0	0	1	0	0	0	25	1	71	0	0	0	0	1	0
133	0	0	0	0	0	0	1	0	0	1	0	0	0	0	0	0	0	0	25	0	38	0	0	0	0	1	0
134	0	1	0	0	0	0	1	0	0	0	0	0	0	0	0	0	0	0	25	0	25	0	0	0	0	1	0
135	0	1	0	0	1	0	1	1	0	0	0	0	0	0	0	0	0	0	17	1	66	0	0	0	0	1	0
136	0	1	0	0	0	0	1	0	0	0	0	0	0	0	0	0	0	0	17	0	17	0	0	0	0	1	0
137	1	1	0	0	0	0	1	1	0	1	0	0	1	0	1	1	0	0	16	1	70	0	0	0	0	1	0
138	0	0	0	0	0	0	1	0	0	0	0	0	0	0	0	1	0	0	15	0	16	0	0	0	0	1	0
139	1	0	0	0	0	0	1	0	0	0	0	0	1	0	1	1	0	0	14	1	79	0	0	0	0	1	0
140	0	0	0	0	1	0	1	0	0	0	0	0	0	0	0	0	0	0	13	0	23	0	0	0	0	1	0
141	1	0	0	0	0	0	1	0	0	0	0	0	1	0	1	0	0	0	8	1	69	0	0	0	0	1	0
142	0	0	0	0	0	0	0	0	0	0	0	0	0	0	0	0	0	0	7	0	7	0	0	0	0	1	0
143	1	0	0	0	1	1	1	0	1	1	0	0	1	0	1	1	0	0	1	0	1	0	0	0	0	1	0
144	1	0	0	0	0	0	0	0	0	0	0	0	1	0	1	1	0	0	1	0	1	0	0	0	0	1	0
